# Supplementary material
Source: PubMed Central journal article supplement (PMC7414953)
Supplement: AEM.00789-20-s0001.pdf [file AEM.00789-20-s0001.pdf]

# Fish skin and gut microbiomes show contrasting signatures of host species and habitat

François-Étienne Sylvain, Aleicia Holland, Sidki Bouslama, Émie Audet-Gilbert, Camille Lavoie, Adalberto Luis Val, Nicolas Derome

## Supplementary figures

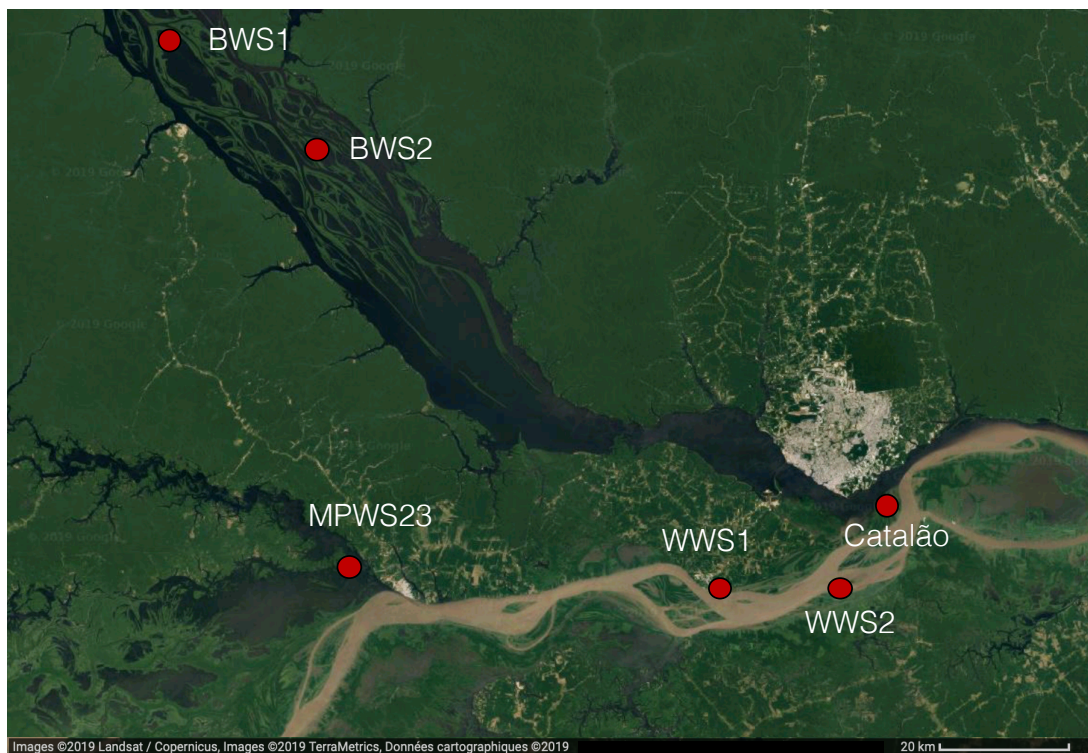

**Supplementary figure 1:** Map of sampling sites in the study.

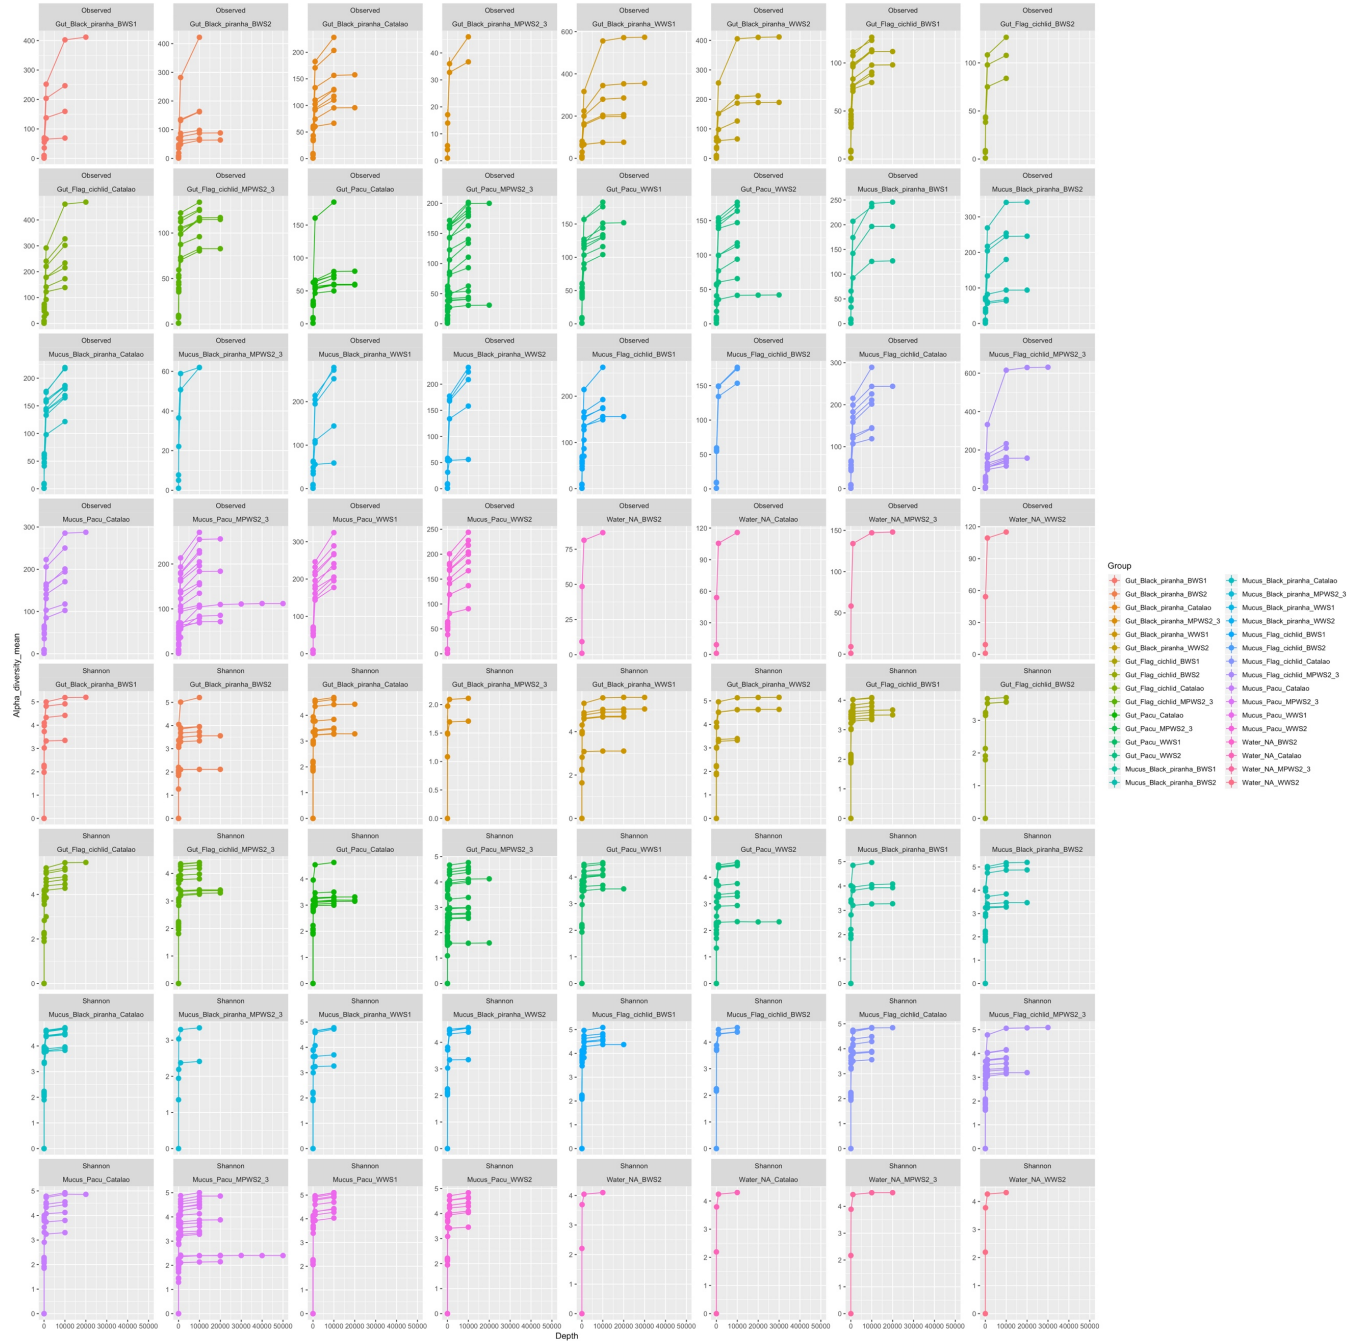

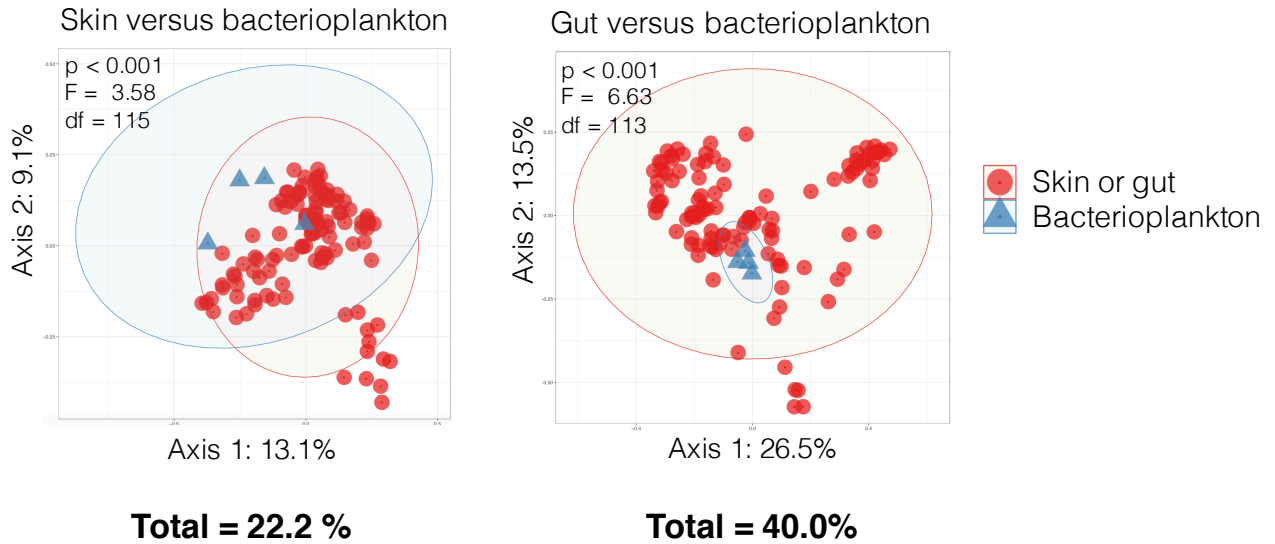

**Supplementary figure 3:** The phylogenetic structure of the skin mucus community is closer to bacterioplankton than to gut community. Principal components analysis show the clustering of all environmental bacterioplankton communities versus all skin or gut communities. Results of PERMANOVA tests between groups are indicated on the top left corner of each PCA plot.

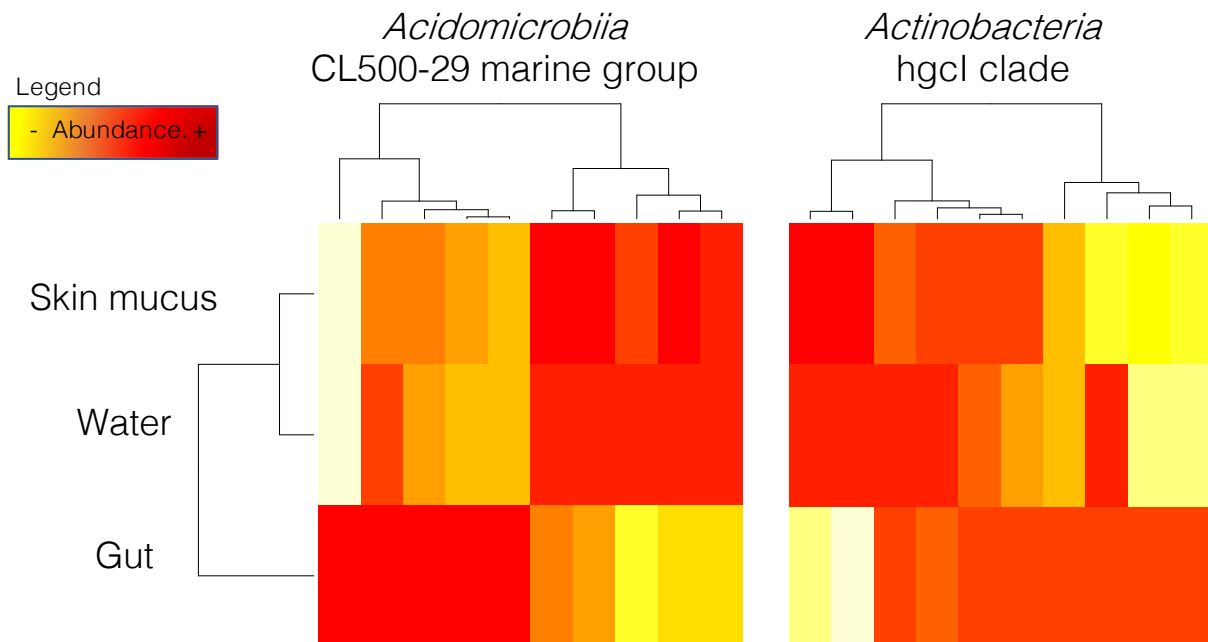

**Supplementary figure 4:** The ASVs from two of the most abundant genera in bacterioplankton share co-abundance with the same ASVs in the fish skin mucus microbiome, but not in the gut microbiome. Heatmaps show the clustering of 10 ASVs from each of the two most important genera in bacterioplankton (CL500-29 marine group

and hgcl clade), based on their mean relative abundance in fish skin mucus, gut and bacterioplankton samples.
